# Supplementary material for: Preparation of –SO3−-coated nanopromoters for methane hydrate formation: effects of the existence pattern of –SO3− groups on the promotion efficiency
Source: Royal Society of Chemistry journal article supplement (doi:10.1039/c6ta08839b), 2016-12-12
Supplement: c6ta08839b1.pdf [file c6ta08839b1.pdf]

**Preparation of  $-\text{SO}_3^-$ -coated nano-promoters for methane hydrate formation:  
effects of the existence pattern of  $-\text{SO}_3^-$  groups on the promotion efficiency**

*Fei Wang,<sup>a</sup> Gang Guo,<sup>a</sup> Sheng-Jun Luo,<sup>\*a</sup> and Rong-Bo Guo<sup>\*a</sup>*

<sup>a</sup> Shandong Industrial Engineering Laboratory of Biogas Production & Utilization, Key Laboratory of Biofuels, Qingdao Institute of Bioenergy and Bioprocess Technology, Chinese Academy of Sciences, Qingdao 266101, Shandong, China.

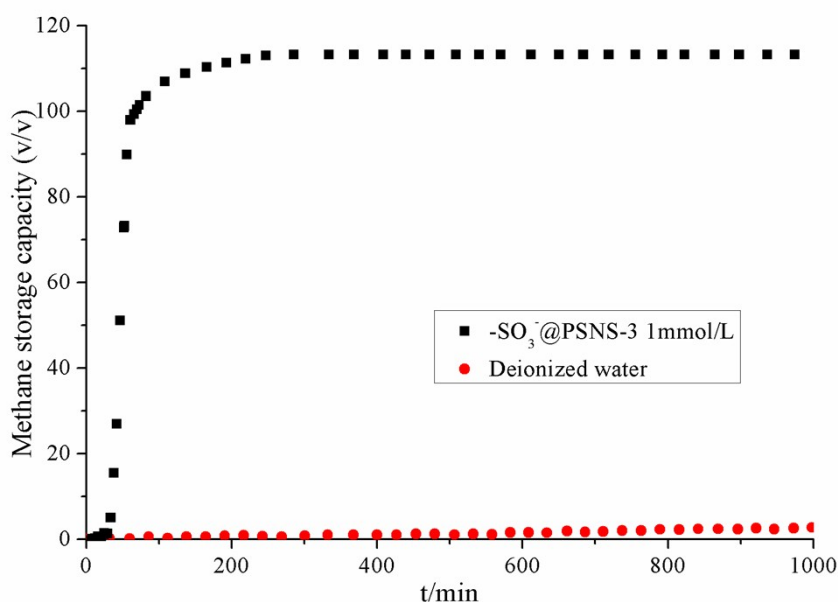

**Fig. S1** Methane hydrate formation rate with  $-\text{SO}_3^-$ @PSNS-3 of 1 mmol/L and deionized water at static condition (the initial conditions were 6 MPa and 275.15 K)
